# Supplementary material for: SDF-1α/CXCR4 Signaling in Lipid Rafts Induces Platelet Aggregation via PI3 Kinase-Dependent Akt Phosphorylation
Source: PubMed Central journal article supplement (PMC5224795; doi:10.1371/journal.pone.0169609), 2017-01-10
Supplement: pone.0169609.s001.pdf [file pone.0169609.s001.pdf]

Table A

| Comparison                  | <i>P</i> (Thr308) | <i>P</i> (Ser473) |
|-----------------------------|-------------------|-------------------|
| 0 ng/ml versus 40 ng/ml     | 0.4274            | 0.9047            |
| 0 ng/ml versus 200 ng/ml    | 0.088             | 0.208             |
| 0 ng/ml versus 1000 ng/ml   | 0.0605            | 0.0516            |
| 0 ng/ml versus 4000 ng/ml   | 0.0115*           | 0.0011*           |
| 40 ng/ml versus 4000 ng/ml  | 0.1781            | 0.0034*           |
| 200 ng/ml versus 4000 ng/ml | 0.6854            | 0.0315*           |
| 0 min versus 2 min          | 0.5828            | 0.0402*           |
| 0 min versus 5 min          | 0.2274            | 0.0069*           |
| 0 min versus 10 min         | 0.0132*           | 0.0002*           |
| 10 min versus 30 min        | 0.0212*           | 0.0135*           |

\*Statistically significant at  $P < 0.05$ 

Table B

| Comparison                                      | <i>P</i> (Thr308) | <i>P</i> (Ser473) |
|-------------------------------------------------|-------------------|-------------------|
| Resting versus SDF-1 $\alpha$                   | 0.0027*           | 0.0006*           |
| SDF-1 $\alpha$ versus AMD3100 + SDF-1 $\alpha$  | 0.0003*           | 0.0002*           |
| SDF-1 $\alpha$ versus LY294002 + SDF-1 $\alpha$ | <.0001*           | 0.0002*           |
| Resting versus AMD3100 + SDF-1 $\alpha$         | 0.2847            | 0.517             |
| Resting versus LY294002 + SDF-1 $\alpha$        | 0.0081*           | 0.6754            |
| AMD + SDF-1 $\alpha$ versus LY + SDF-1 $\alpha$ | 0.1158            | 0.9912            |

\*Statistically significant at  $P < 0.05$ 

Table C

| Comparison                                          | <i>P</i> (Thr308) | <i>P</i> (Ser473) |
|-----------------------------------------------------|-------------------|-------------------|
| Resting versus SDF-1 $\alpha$                       | <.0001*           | 0.002*            |
| SDF-1 $\alpha$ versus M $\beta$ CD + SDF-1 $\alpha$ | <.0001*           | 0.0063*           |
| Resting versus M $\beta$ CD + SDF-1 $\alpha$        | 0.0244*           | 0.4825            |

\*Statistically significant at  $P < 0.05$
